# Supplementary material for: Bright and ultrafast electron point source made of LaB6 nanotip
Source: Royal Society of Chemistry journal article supplement (doi:10.1039/d3na00069a), 2023-01-01
Supplement: d3na00069a1.pdf [file d3na00069a1.pdf]

# Supporting Information: Bright and ultrafast electron point source made of LaB<sub>6</sub> nanotip.

O. Bhorade,<sup>†</sup> B. Deconihout,<sup>†</sup> I. Blum,<sup>†</sup> S. Moldovan,<sup>†</sup> J. Houard,<sup>†</sup> A. Normand,<sup>‡</sup> K. Jagtap,<sup>‡</sup> M. More,<sup>‡</sup> and A. Vella<sup>\*,†</sup>

<sup>†</sup>*Univ Rouen Normandie, INSA Rouen Normandie, CNRS, Groupe de Physique des Matériaux, Avenue de l'Université BP 12, 76801 Saint Etienne du Rouvray, France*

<sup>‡</sup>*Department of Physics, Savitribai Phule Pune University, Pune, 411007, India*

E-mail: [angela.vella@univ-rouen.fr](mailto:angela.vella@univ-rouen.fr)

Phone: +33 (0)232 955168. Fax: +33 (0)232 955054

## Supporting Information Available

### Measure of electron current as a function of laser power and polarization angle

We measure the emitted current as function of the laser intensity at V=100V, in the MPP regime. The linear behavior reported on the log-log scale (see Fig. S1) can be fitted by the power law  $I \propto P_{laser}^n$  with  $n = 3.6 \pm 0.1$ .

We measure the emitted current as function of the angle  $\alpha$  between the electric field of the laser and the major axis of the field emitter, in the MPP regime (see Fig.S2). The fit by a sinusoidal function  $I \propto (\cos(\alpha))^{2n}$  with  $n = 5$  shows that in the MPP regime a mean number of 5 photons is involved in the emission process.

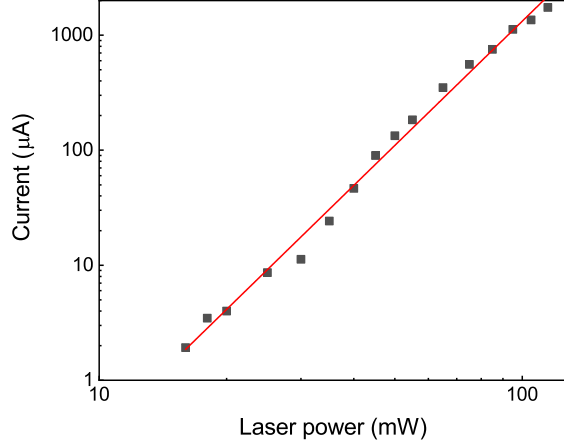

Figure S1: Electron current as a function of laser power (black square) at  $V=100V$  and fit (red line) using a power law:  $I \propto P_{laser}^n$  with  $n = 3.6 \pm 0.1$ , indicating the MMP emission process.

## Emission pattern and energy spectra in the MMP regime at low laser intensity

We report in Fig.S3 the FEM pattern at  $V=300V$  and  $I=5 \text{ GW/cm}^2$  and the energy spectra for each area indicated by a yellow circle. The main emission is from region R5 corresponding to the (001) pole. The energy spectra show a lower energy for electrons from region R5 due to the lower work function of (001) pole compared to (011) poles.

## Brightness calculation

The Fig.S4 shows the set-up dimensions, the electron trajectories, the associated effective radius  $r_v$  and the semi-angle of divergence  $\alpha$ . The  $m$  factor, known as the projection point factor, is calculated measuring on the screen the distance  $D$  between the central  $\langle 001 \rangle$  pole and the  $\langle 110 \rangle$  pole on a FIM image. Because for a cubic crystal the angular distance

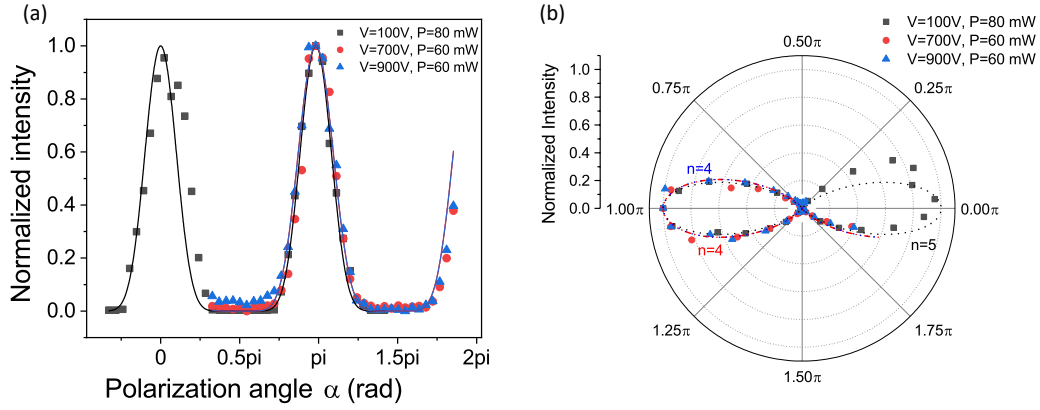

Figure S2: (a) Linear and (b) polar representation of emitted current as a function of the angle  $\alpha$  between the electric field of the laser and the major axis of the field emitter.

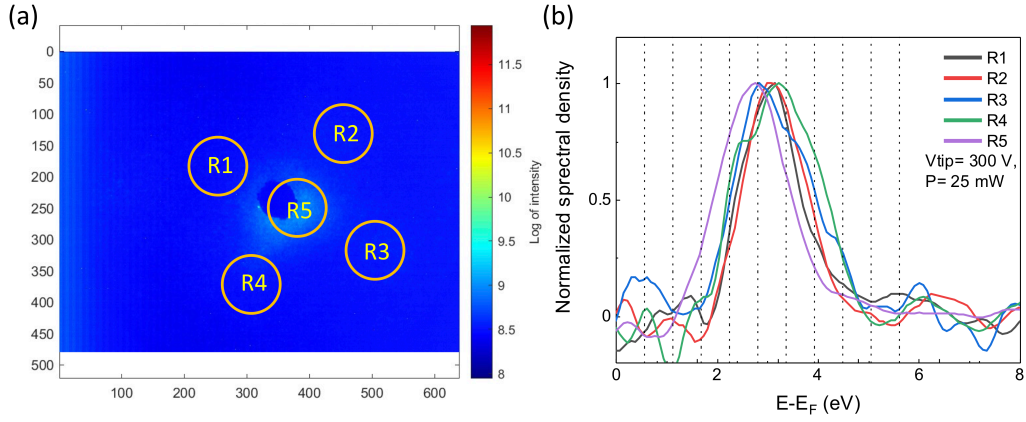

Figure S3: (a) FEM pattern at  $V=300\text{V}$  and  $I=5\text{ GW}/\text{cm}^2$ . (b) Energy spectra for each area indicated by a yellow circle in (a) at  $V=300\text{V}$  and  $I=5\text{ GW}/\text{cm}^2$ .

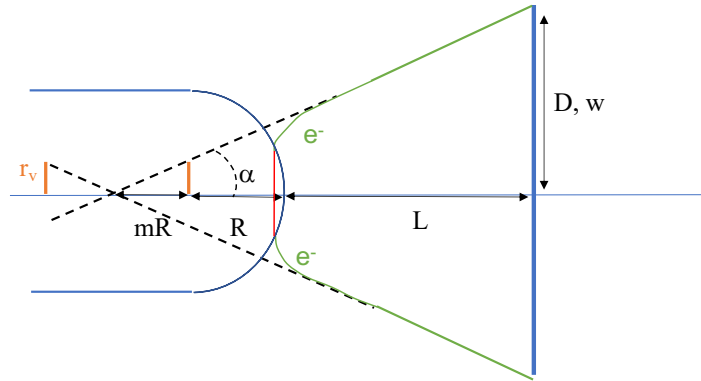

Figure S4: Electron trajectory diagram showing the set-up dimensions and the definition of the effective radius  $r_v$  for the emission area.

between these two poles is  $45^\circ$  we obtain:

$$m + 1 = \frac{45}{\arctan(D/L)}$$

with  $L$  the tip-screen distance. For  $D = 3\text{cm}$  and  $L = 6.5\text{ cm}$ ,  $m = 0.8$ .

The solid angle is calculated as:  $\theta = 2\pi(1 - \cos(\alpha))$ , with

$$\alpha = \arctan(w/L),$$

where  $w = \frac{1}{2}$ FWHM of the gaussian profile of the emission spot. The physical radius of the electron source is calculated as:

$$r_v = mR \tan(\alpha)$$

and the physical source size as:  $S_v = \pi * r_v^2$ . The brightness is:

$$B = \frac{I}{\pi r_v^2 \theta},$$

with  $I$  the emitted current. For static emission we measure current up to 10 nA, using a picoammeter between the high voltage power supply and the sample. However, due to the limitation of our detector, we can not register the associated FEM images.

Table 1: default

| Voltage (V) | Power (mW) | Current (pA) | FWHM (mm) | $\alpha$ (rad) | $\theta$ (sr) | $r_v$ (nm) | $B \times 10^9$ A/(m <sup>2</sup> Sr <sup>1</sup> ) |
|-------------|------------|--------------|-----------|----------------|---------------|------------|-----------------------------------------------------|
| Sample 1    |            |              |           |                |               |            |                                                     |
| 660         | 0          | 0.5          | 4         | 0.03           | 0.003         | 0.246      | 0.88                                                |
| 800         | 0          | 6            | 7         | 0.05           | 0.009         | 0.430      | 1.13                                                |
| 400         | 40         | 0.25         | 7         | 0.05           | 0.009         | 0.430      | 0.047                                               |
| Sample 2    |            |              |           |                |               |            |                                                     |
| 465         | 0          | 0.1          | 4         | 0.03           | 0.003         | 0.246      | 0.17                                                |
| 485         | 0          | 0.25         | 5         | 0.038          | 0.0046        | 0.307      | 0.18                                                |
| 565         | 0          | 5            | 6         | 0.046          | 0.0067        | 0.370      | 1.75                                                |

For lower current values, we measure the current on the phosphor screen  $I_{screen}$  and then we calculated the emitted current dividing  $I_{screen}$  by the detector gain-factor  $G$ . The gain-factor was measured at low emission currents, counting individual impacts on the screen. For an MCP voltage of 1550 V,  $G = 10^7$ . The values of current and the corresponding brightness are reported on the Table. For example, at a voltage of 565V we measured a current of 5pA, a semi-angle of divergence of 0.046 rad, an effective radius of 0.37 nm and a brightness of  $1.75 \times 10^9 \text{ Am}^{-2}\text{Sr}^{-1}$ . These value is lower than what was reported in the recent works on the emission from LaB<sub>6</sub>, however, if we suppose that the solid angle of emission stays almost stable increasing the applied voltage from 500V to 850V and the emitted current from 5 pA to 10 nA, then we obtain a brightness of  $10^{12} \text{ Am}^{-2}\text{Sr}^{-1}$  close to the values reported in the literature.
